# Supplementary material for: Benzene-cored fluorophors with TPE peripheries: facile synthesis, crystallization-induced blue-shifted emission, and efficient blue luminogens for non-doped OLEDs
Source: Royal Society of Chemistry journal article supplement (doi:10.1039/c2jm31855e), 2012-01-01
Supplement: c2jm31855e.pdf [file c2jm31855e.pdf]

## Electronic Supplementary Information

# Benzene-Cored Fluorophors with TPE Peripheries: Facile synthesis, Crystallization-induced Blue-Shifted Emission, and Efficient blue luminogens for non-doped OLEDs

Jing Huang,<sup>a</sup> Ning Sun,<sup>b</sup> Jie Yang,<sup>a</sup> Runli Tang,<sup>a</sup> Qianqian Li,<sup>a</sup> Dongge Ma,<sup>\*,b</sup> Jingui Qin,<sup>a</sup> and Zhen Li<sup>\*,a</sup>

<sup>a</sup> Department of Chemistry, Hubei Key Lab on Organic and Polymeric Opto-Electronic Materials, Wuhan University, Wuhan 430072, China.

E-mail: [lizhen@whu.edu.cn](mailto:lizhen@whu.edu.cn) and [lichemlab@163.com](mailto:lichemlab@163.com).

<sup>b</sup> State Key Laboratory of Polymer Physics and Chemistry, Changchun, Institute of Applied Chemistry, Chinese Academy of Sciences, Changchun, 130022, People's Republic of China.

E-mail: [mdg1014@ciac.jl.cn](mailto:mdg1014@ciac.jl.cn).

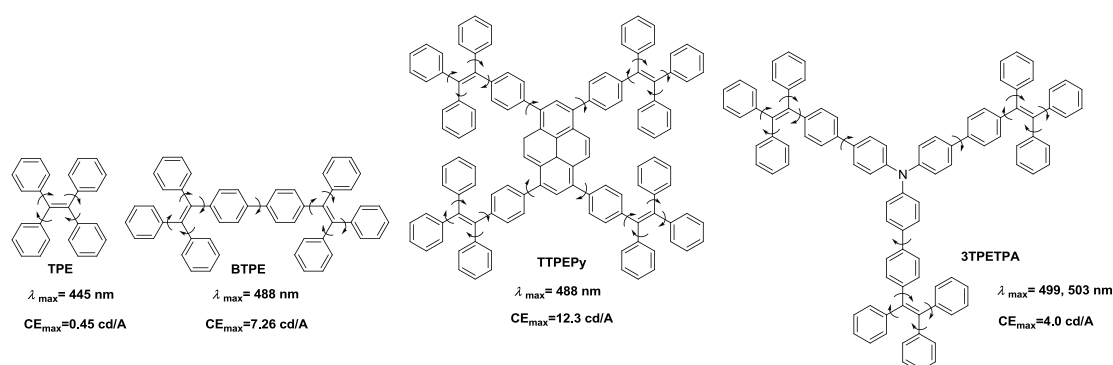

**Chart S1** The EL peaks and maximum current efficiencies of TPE and typical TPE-based luminogens.

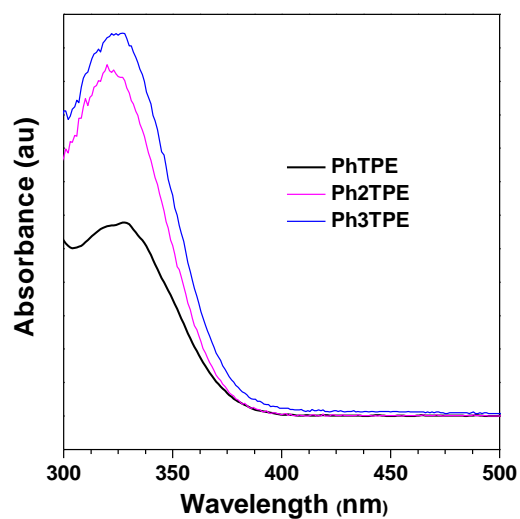

**Figure S1** UV spectra in THF solution. Concentration ( $\mu\text{M}$ ): 12.6 , 13.7 and 11.6 for PhTPE, Ph2TPE and Ph3TPE, respectively.

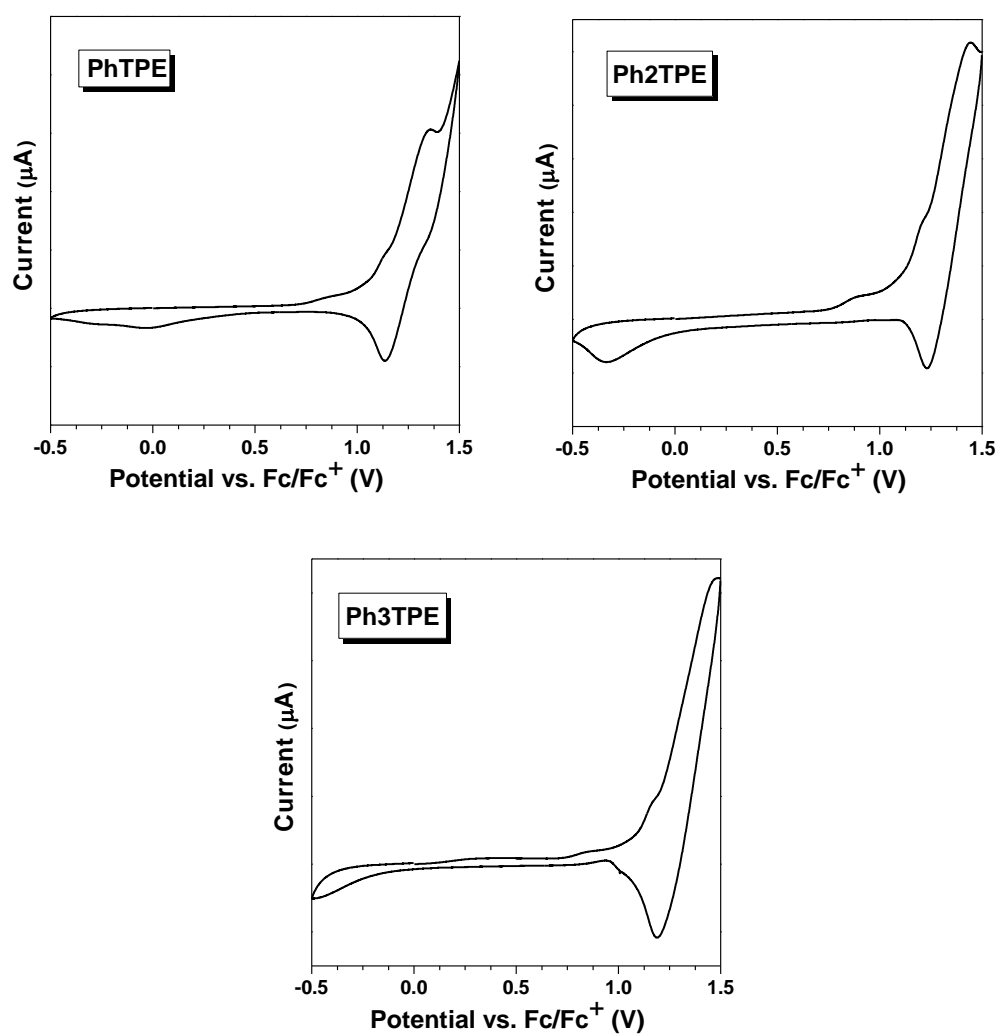

**Figure S2** Cyclic Voltammograms of PhTPE, Ph2TPE and Ph3TPE in  $\text{CH}_2\text{Cl}_2$ .
